# Supplementary material
Source: publisher site journal article supplement (https://www.dovepress.com/article/379378)
Supplement: Supplementary file 1 [file get_supplementary_file.php]

## Appendix A

| Measurement Items                                                                                                                                                                                                                                                                                                                                      | Sources                                                                |
|--------------------------------------------------------------------------------------------------------------------------------------------------------------------------------------------------------------------------------------------------------------------------------------------------------------------------------------------------------|------------------------------------------------------------------------|
| <b>Perceived usefulness</b>                                                                                                                                                                                                                                                                                                                            |                                                                        |
| Using MOOCs would improve my academic performance.<br>Using MOOCs would enhance my effectiveness in learning.<br>I would find learning in MOOC useful for me.<br>Using MOOCs would enable me to accomplish tasks more effectively. (e.g., learning at the time I want to learn)                                                                        | Lewis et al. (2003) and Li et al. (2012)                               |
| <b>Course Quality</b>                                                                                                                                                                                                                                                                                                                                  |                                                                        |
| The content of the course materials provided by the MOOCs is complete<br>The content of the course materials provided by the MOOCs is easy to comprehend<br>The course materials provided by the MOOCs learning site are well represented with text and graphics<br>The content of the course materials provided by the MOOCs is relevant to the topic | Ming Yang et al. (2017)<br>Chiu et al. (2007)                          |
| <b>Service Quality</b>                                                                                                                                                                                                                                                                                                                                 |                                                                        |
| MOOCs platform provides prompt responses to my request<br>MOOCs platform provides right solution to my request<br>The service provided in MOOCs platform attends to individual's personalized needs<br>The service provided in MOOCs platform is reliable                                                                                              | Ming Yang et al. (2017)<br>Chiu et al. (2007)                          |
| <b>System Quality</b>                                                                                                                                                                                                                                                                                                                                  |                                                                        |
| The user interface of the MOOCs platform is well designed<br>The MOOCs platform can quickly load all the text and graphics<br>It is easy to navigate the MOOCs platform<br>The MOOCs platform functions well all the time                                                                                                                              | Ming Yang et al. (2017)<br>Chiu et al. (2007)                          |
| <b>Confirmation</b>                                                                                                                                                                                                                                                                                                                                    |                                                                        |
| My experience with using the MOOCs was better than I expected<br>The service level provided by the MOOCs was better than I expected.<br>Most of my expectations from using the MOOCs were confirmed                                                                                                                                                    | G. Da_ghan, B. Akkoyunlu (2016)                                        |
| <b>Satisfaction</b>                                                                                                                                                                                                                                                                                                                                    |                                                                        |
| I am satisfied with the performance of the MOOCs<br>I am pleased with the experience of using MOOCs service<br>My decision to use the MOOCs service was a wise one                                                                                                                                                                                     | Spreng et al. (1996);<br>Bathacharjee (2001)                           |
| <b>Retention Intention</b>                                                                                                                                                                                                                                                                                                                             |                                                                        |
| I intend to use MOOC in the future continuously<br>I intend to utilize MOOCs for various purposes such as self-development as well as earning credit hours.<br>If MOOCs becomes diverse in the future, I intent to use it frequently even after graduation.                                                                                            | Young et al. (2018)<br>Bhattacharjee (2001)<br>and Zhang et al. (2012) |
| <b>External Regulation</b>                                                                                                                                                                                                                                                                                                                             |                                                                        |
| I participate in the MOOCs discussion because that is the class rule<br>I study this course because I don't want my friends/peer to yell at me<br>I study this course because that's what I'm supposed to do                                                                                                                                           | Ryan &<br>Connell (1989);<br>Park et al. (2005)                        |
| <b>Introjected Regulation</b>                                                                                                                                                                                                                                                                                                                          |                                                                        |
| I try to enroll in MOOCs because I will feel bad about myself if I don't<br>I do courses in MOOCs because I want people around me to think I am smart.<br>I use MOOCs for learning because I will feel ashamed of myself if I do not.                                                                                                                  | Ryan &<br>Connell (1989);<br>Park et al. (2005)                        |
| <b>Identified Regulation</b>                                                                                                                                                                                                                                                                                                                           |                                                                        |
| It is important for me to use MOOCs to learn<br>I study on MOOCs because it is meaningful.<br>I value the benefits of using MOOCs.<br>I study on MOOCs because of skill development                                                                                                                                                                    | Ryan &<br>Connell (1989);<br>Park et al. (2005)                        |
| <b>Integrated Regulation</b>                                                                                                                                                                                                                                                                                                                           |                                                                        |
| I enjoy studying on MOOCs.<br>I find learning in MOOCs a pleasurable activity<br>I participate in the MOOCs discussion because I enjoy it.<br>I do my tasks because I enjoy studying in MOOCs                                                                                                                                                          | Ryan &Connell (1989);<br>Park et al. (2005)                            |
| <b>Perceived Fear</b>                                                                                                                                                                                                                                                                                                                                  |                                                                        |

|                                                                                                                                                                                                                                                                                    |                                             |
|------------------------------------------------------------------------------------------------------------------------------------------------------------------------------------------------------------------------------------------------------------------------------------|---------------------------------------------|
| Covid19 represent situation of maximum danger, potentially unlimited struggle and sacrifices<br>I prefer online learning to avoid the existent threat.<br>I will stay home and will continue study using online learning platforms.<br>I prefer online learning in this emergency. | Murphy MPA (2020);<br>Preiser et at. (2020) |
| <b>Intention to Recommend</b>                                                                                                                                                                                                                                                      |                                             |
| I will recommend others by social networking sites to learn from MOOCs, if I have a good experience.<br>I will always recommend to my others by social networking sites (i.e., Facebook, Weibo and WeChat) to enroll in MOOCs, if it is accessible to them.                        | Caroline Lancelot &<br>Oliveira (2013)      |

## Appendix B

### Demographic profile of Sample characteristics

| Items            | Type                | Numbers | Percentage |
|------------------|---------------------|---------|------------|
| <b>Gender</b>    | Male                | 127     | 43.2       |
|                  | Female              | 167     | 56.8       |
| <b>Age</b>       | <30                 | 3       | 1.1        |
|                  | 30-45               | 73      | 92.8       |
|                  | >45                 | 18      | 6.1        |
| <b>Education</b> | Bachelor            | 10      | 3.4        |
|                  | Master              | 254     | 86         |
|                  | Doctoral & Post doc | 30      | 10         |
| <b>Use time</b>  | 6 months            | 81      | 27         |
|                  | 1 year              | 169     | 57         |
|                  | More than 1 year    | 44      | 12         |

## Appendix C

### Variance Inflation Factor (VIF)

|               | PU    | RI    | SAT   |
|---------------|-------|-------|-------|
| <b>CQ</b>     | 2.191 |       |       |
| <b>CON</b>    |       | 2.546 | 2.446 |
| <b>ER</b>     |       |       | 2.573 |
| <b>IR</b>     |       |       | 3.164 |
| <b>IdentR</b> |       |       | 3.120 |
| <b>InteR</b>  |       |       | 2.388 |
| <b>OP</b>     | 1.339 | 1.477 |       |
| <b>PU</b>     |       | 2.612 | 3.867 |
| <b>RI</b>     |       |       |       |
| <b>RPU</b>    |       | 1.989 | 2.193 |
| <b>SQ</b>     | 1.904 |       |       |
| <b>SAT</b>    |       | 2.661 |       |
| <b>SrQ</b>    | 1.591 |       |       |
